# Supplementary material
Source: PubMed Central journal article supplement (PMC4023477)
Supplement: NIHMS577795-supplement-01.pdf [file NIHMS577795-supplement-01.pdf]

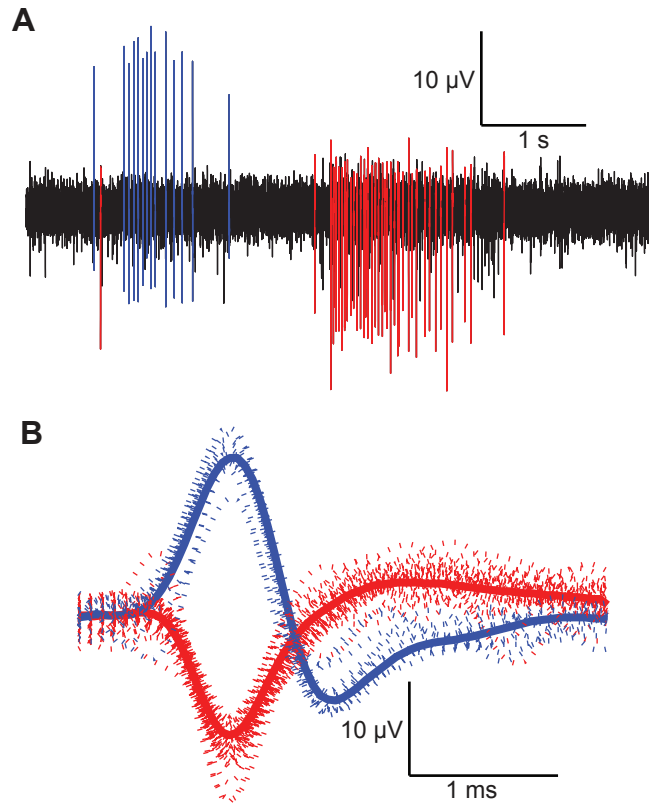

**Figure S1, related to Figure 1, Clustering of Spikes to Identify Individual Neurons.**

(A) Example of MEA data from a single electrode with spikes from two clusters in blue and red.

(B) Traces of clusters (solid lines) and individual spikes classified within each cluster (broken lines).

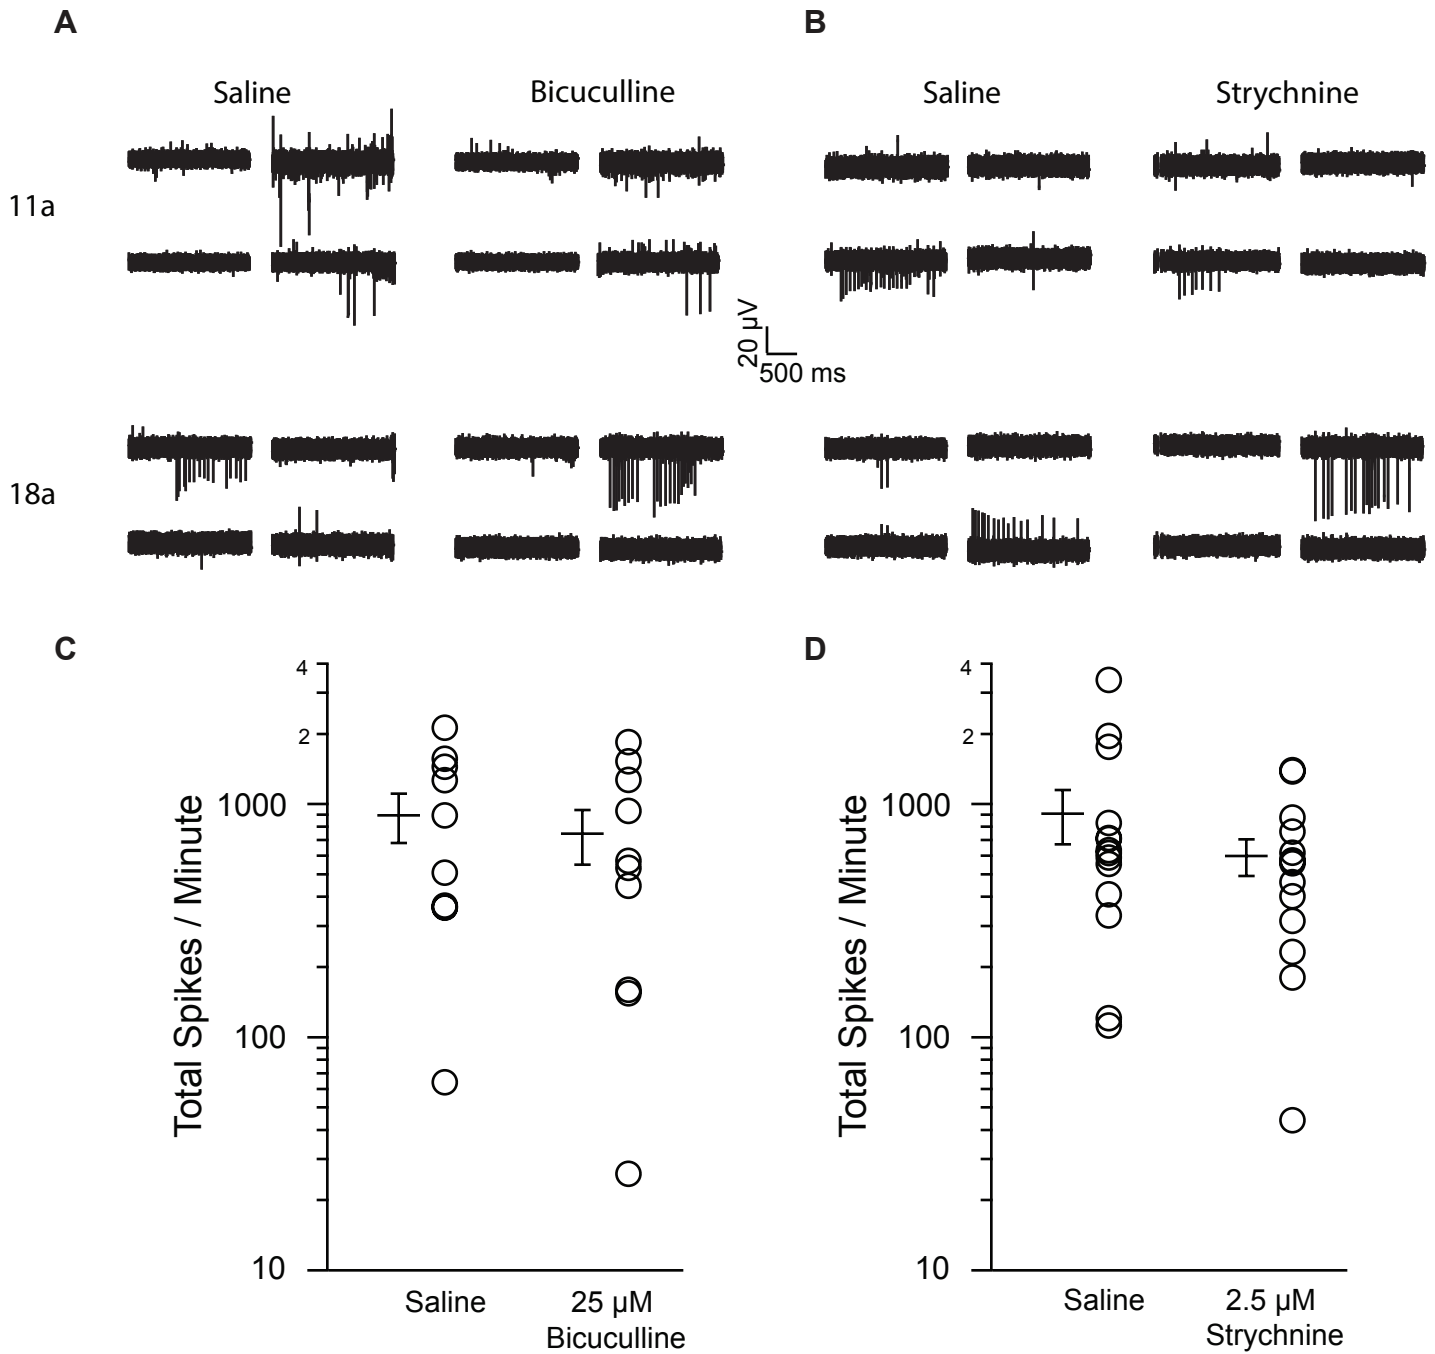

**Figure S2, related to Figure 1, Effect of Bicuculline and Strychnine on Spike Firing.**

(A) Representative recordings from four/64 MEA electrodes before (left) and after (right) the application of 25  $\mu$ M bicuculline in neurons derived from 11a and 18a.

(B) Representative recordings from four/64 MEA electrodes before (left) and after (right) the application of 2.5  $\mu$ M strychnine in neurons derived from 11a and 18a.

(C) Total spikes/minute before and after treatment with 25  $\mu$ M bicuculline (n=10).

(D) Total spikes/minute before and after treatment with 2.5  $\mu$ M strychnine (n=14).

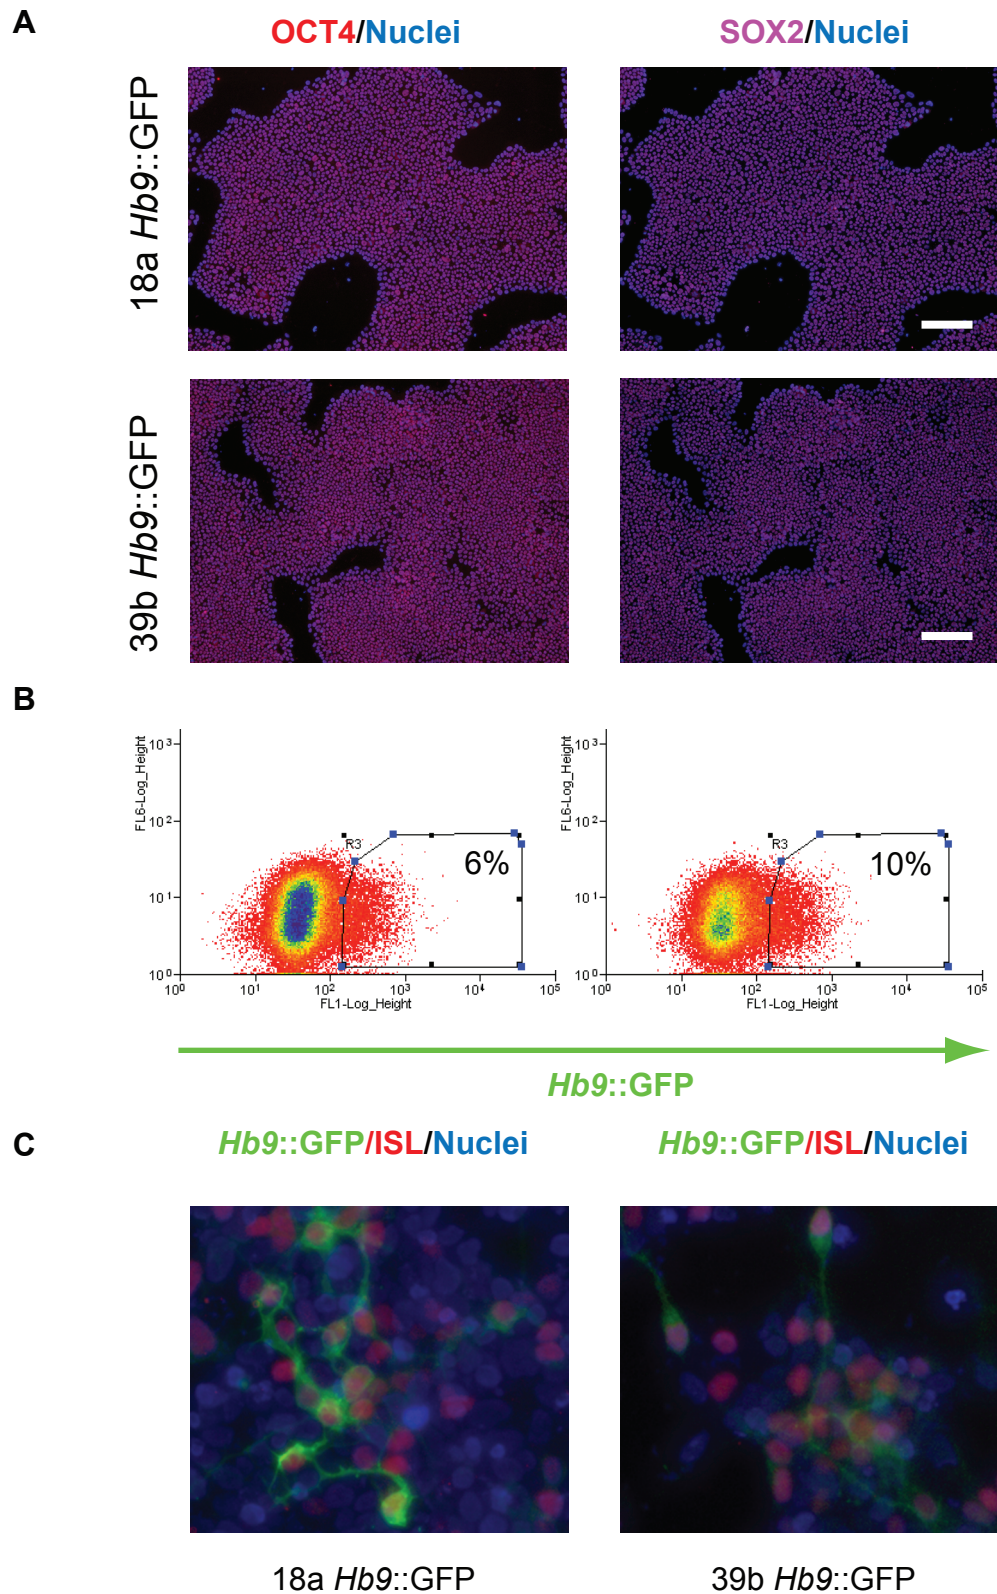

**Figure S3, related to Figure 1. Characterization and Sorting of 18a *Hb9::GFP* and 39b *Hb9::GFP* reporter iPS Cell Lines.**

(A) Representative immunofluorescence staining of 18 and 39 iPS *Hb9::GFP* reporter cell lines demonstrates expression of the pluripotency marker OCT4 (red) and SOX2 (magenta). Scale bar is 100  $\mu$ m.

(B) Fluorescence cell sort analysis of the reporter cell lines after motor neuron differentiation.

(C) ISL expression indicates motor neuron identity of *Hb9::GFP* positive cells derived from differentiating 18a and 39b reporter iPS cell lines.

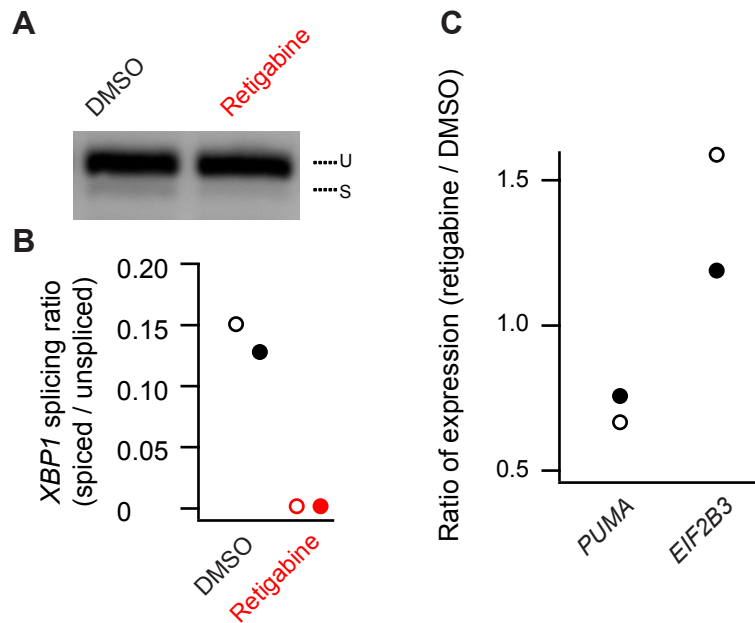

**Figure S4, related to Figure 5, Retigabine Decreases Activation of ER Stress Pathways.**

(A) Blots of unspliced (u) and spliced (s) *XBP1* in sorted 39b-*SOD1*<sup>+/A4V</sup> Hb9:RFP-sorted motor neurons treated with DMSO vehicle or 1  $\mu$ M retigabine from days 15-30.

(B) Quantification of effect on *XBP1* splicing in motor neurons from two independent replicates (open and filled circles).

(C) Ratio of qRT-PCR product for genes associated with ER stress following retigabine compared to DMSO treatment in the same two independent replicates.

**A**

| Patient ID | Gender | Mutation      | Age of Onset | Age at Skin Biopsy |
|------------|--------|---------------|--------------|--------------------|
| RB21       | Female | FUS H517Q     | 43           | 49                 |
| MGH5       | Female | FUS M511Nfs*6 | 19           | 19                 |

**NANOG Nuclei****SSEA-4 Nuclei****B**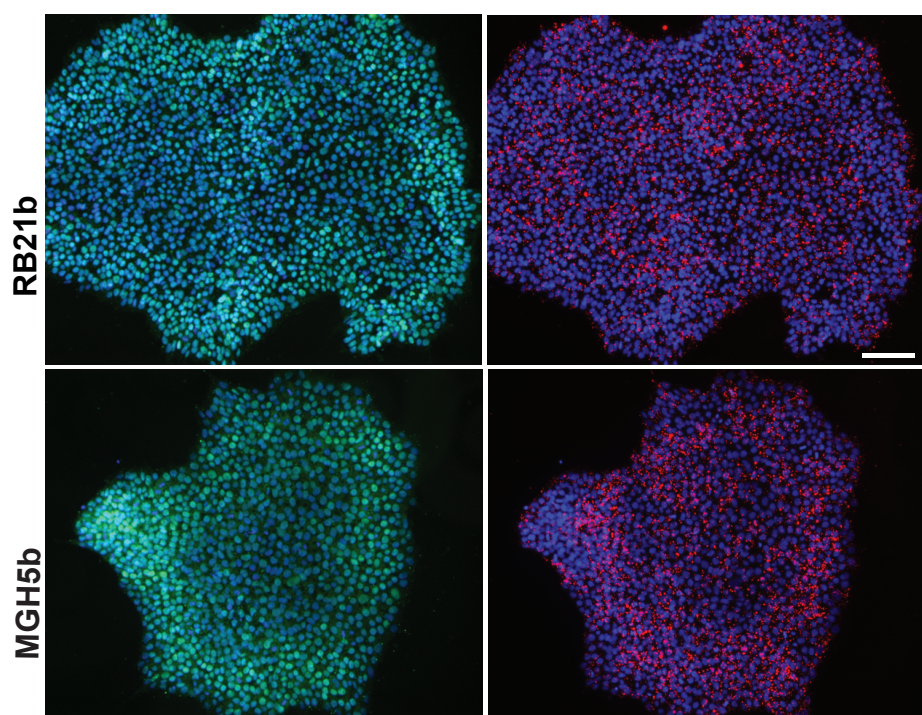**C**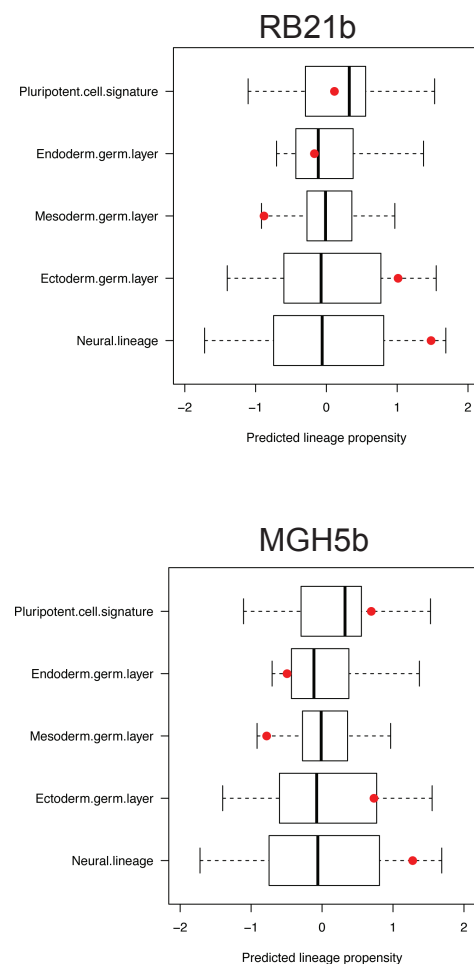

**Figure S5, related to Figure 5, Characterization of FUS iPS Cell Lines.**

(A) FUS-ALS patient line characteristics

(B) Representative immunofluorescence staining of iPS cell colonies demonstrating the expression of pluripotency markers NANOG (green) and SSEA-4 (red). Cell nuclei are fluorescently labeled with Hoescht. Scale bar is 100  $\mu$ m.

(C) Scorecard analysis of pluripotency and lineage specific genes at day 16 of undirected iPS cell differentiation

**Table S1, related to Figures 1-3, 5, 6, Electrophysiological Comparisons of Motor Neurons.**  
Summary of lines, numbers of MEAs/cells and differentiations for individual experiments.

| Property and Technique                   | Figure and Time        | Lines                                                                                                        | Total MEAs/Cells                                                      | Differentiations |
|------------------------------------------|------------------------|--------------------------------------------------------------------------------------------------------------|-----------------------------------------------------------------------|------------------|
| Total spikes/minute (MEA)                | Figure 1C<br>28 days   | 11a, 18a vs 39b, RB9d                                                                                        | 9 MEAs                                                                | 4                |
| Neuronal mean firing rate (MEA)          | Figure 1E<br>28 days   | 11a, 18a vs 39b, RB9d                                                                                        | 1754 cells                                                            | 4                |
| Total spikes/minute (MEA)                | Figure 1F<br>4-28 days | 18a vs 39b (both HB9::GFP)                                                                                   | 23 MEAs                                                               | 3                |
| Total spikes/minute (MEA)                | Figure 1G<br>14 days   | 39b-Cor vs 39b                                                                                               | 8 MEAs                                                                | 3                |
| Number of spikes on ramp (Patch)         | Figure 2C<br>28 days   | 11a, 18a vs 39b, RB9d                                                                                        | 48 cells                                                              | 4                |
| Number of spikes on ramp (Patch)         | Figure 2D<br>28 days   | 39b-Cor vs 39b                                                                                               | 36 cells                                                              | 3                |
| Relative K(DR)/ Total Na Current (Patch) | Figure 3B<br>28 days   | 11a, 18a vs 39b, RB9d                                                                                        | 48 cells                                                              | 4                |
| Relative K(DR)/ Total Na Current (Patch) | Figure 3C<br>28 days   | 39b-Cor vs 39b                                                                                               | 37 cells                                                              | 3                |
| Absolute K(DR) and Na Current (Patch)    | Figure 3D-E<br>28 days | 39b-Cor vs 39b                                                                                               | 37 cells                                                              | 2                |
| Total spikes/minute (MEA)                | Figure 5B<br>14 days   | 11a, 18a vs 19f, RB8b                                                                                        | 10 MEAs                                                               | 2                |
| Neuronal mean firing rate (MEA)          | Figure 5C<br>14 days   | 11a, 18a vs 19f, RB8b                                                                                        | 1621 cells                                                            | 2                |
| Total spikes/minute (MEA)                | Figure 6A<br>14 days   | Control: 11a, 15b, 17a, 18a, 18b, 20b<br>SOD1: 25b, 27b, 39b, RB9d<br>C9orf72: 19f, RB8b<br>FUS: MGH5b, RB21 | Control: 38 MEAs<br>SOD1: 20 MEAs<br>C9orf72: 15 MEAs<br>FUS: 14 MEAs | 4                |

**Table S2, related to Figures 2-3, Electrophysiological Properties of Motor Neurons.** No comparisons between control and ALS motor neurons reached statistical significance, in either the initial 4 Lines (11a, 18a, 39b, and RB9d) or later gene correction (39b-Cor and 39b) experiments.

|                                     | 4 Lines                   |                        | Gene Correction          |                  |
|-------------------------------------|---------------------------|------------------------|--------------------------|------------------|
|                                     | Control: 11a, 18a<br>n=23 | ALS: 39b, RB9d<br>n=25 | Control: 39b-Cor<br>n=18 | ALS: 39b<br>n=19 |
| Capacitance (pF)                    | 38.8 ± 4.1                | 39.3 ± 2.6             | 34.7 ± 3.8               | 36.3 ± 4.7       |
| Resting V <sub>m</sub> (mV)         | -50.7 ± 2.5               | -46.0 ± 2.3            | -45.1 ± 2.1              | -48.0 ± 2.3      |
| Input Resistance (MΩ)               | 1148 ± 130                | 856 ± 94               | 1295 ± 183               | 1047 ± 97        |
| Rheobase (pA)                       | 9.0 ± 2.0                 | 6.8 ± 0.9              | 4.1 ± 1.5                | 3.0 ± 0.7        |
| Spike Voltage Threshold (mV)        | -42.3 ± 1.8               | -42.5 ± 1.2            | -43.5 ± 0.6              | -44.7 ± 1.0      |
| Spike Width (ms)                    | 3.4 ± 0.3                 | 3.1 ± 0.2              | 1.8 ± 0.2                | 1.6 ± 0.1        |
| Spike Peak (mV)                     | 16.3 ± 2.6                | 23.6 ± 2.7             | 25.8 ± 3.0               | 31.4 ± 1.7       |
| Maximum Upstroke Velocity (mV/ms)   | 76.2 ± 8.8                | 109.9 ± 13.0           | 117.9 ± 18.6             | 146 ± 9.9        |
| Maximum Downstroke Velocity (mV/ms) | 24.4 ± 2.3                | 28.3 ± 2.1             | 37.1 ± 4.2               | 40.8 ± 3.1       |
| After-hyperpolarization (mV)        | -60.9 ± 2.4               | -60.5 ± 1.9            | -63.8 ± 0.4              | -65.4 ± 1.2      |

**Table S3, related to Figure 4, RNA-Seq Expression of Voltage-Gated Potassium Channels.** Mean normalized transcript counts per million of voltage-gated potassium channels present in 39b-Cor and 39b-derived motor neurons.

| Gene  | 39b-Cor | 39b     |
|-------|---------|---------|
| KCNA1 | 56.85   | 22.98   |
| KCNA2 | 25.16   | 24.87   |
| KCNA3 | 16.34   | 35.63   |
| KCNA4 | 10.43   | 8.26    |
| KCNA5 | 7.807   | 7.05    |
| KCNA6 | 646.65  | 422.77  |
| KCNB1 | 142.77  | 161.55  |
| KCNB2 | 41.96   | 36.99   |
| KCNC1 | 311.56  | 293.43  |
| KCNC2 | 14.49   | 28.52   |
| KCNC3 | 132.75  | 74.13   |
| KCNC4 | 88.24   | 108.16  |
| KCND1 | 17.33   | 47.55   |
| KCND2 | 307.23  | 243.56  |
| KCND3 | 706.92  | 1425.60 |
| KCNF1 | 93.49   | 28.68   |
| KCNG1 | 81.24   | 134.45  |
| KCNG2 | 15.10   | 7.42    |
| KCNH1 | 23.82   | 14.79   |
| KCNH2 | 372.19  | 300.71  |
| KCNH3 | 13.406  | 14.32   |
| KCNH5 | 16.68   | 58.85   |
| KCNH7 | 12.85   | 22.20   |
| KCNH8 | 135.75  | 245.41  |
| KCNQ2 | 476.93  | 427.27  |
| KCNQ3 | 133.21  | 155.91  |
| KCNQ4 | 6.06    | 17.35   |
| KCNQ5 | 37.39   | 76.20   |
| KCNV1 | 210.74  | 81.48   |
